# Supplementary material for: A nanoplasmonic probe as a triple channel colorimetric sensor array for protein discrimination
Source: Royal Society of Chemistry journal article supplement (doi:10.1039/c6an00302h), 2016-01-01
Supplement: c6an00302h1.pdf [file c6an00302h1.pdf]

## Supplementary Information

### **Nanoplasmonic probe as a triple channel colorimetric sensor array for proteins discrimination**

Jinpeng Mao,<sup>a</sup> Yuexiang Lu,<sup>b</sup> Ning Chang,<sup>a</sup> Jiaoe Yang,<sup>a</sup> Jiacheng Yang,<sup>a</sup> Sichun Zhang <sup>c</sup> and Yueying Liu<sup>\*a</sup>

<sup>a</sup> Department of Chemistry, Capital Normal University, Xisanhuan North Rd. 105, Beijing, 100048, P.R. China

<sup>b</sup> Institute of Nuclear and New Energy Technology, Tsinghua University, Beijing 100084, P.R. China

<sup>c</sup> Department of Chemistry, Tsinghua University, Beijing 100084, P. R. China

\*Corresponding Author: [yueyingliu@cnu.edu.cn](mailto:yueyingliu@cnu.edu.cn)

## Experimental section

**Materials and instruments** The oligonucleotide was purchased from Sangon Biotech Co., Ltd. (Shanghai, China): 5'-AAA AAA AAA AAA AAA AAA AAA-3' (named A21). Sodium chloride and Chloroauric acid ( $\text{HAuCl}_4$ ) were purchased from Sinopharm Chemical Reagent Company (Beijing, China). Sodium citrate was purchased from Xilong Chemical Co., Ltd. (Shantou, China). Hydroxylamine hydrochloride ( $\text{NH}_2\text{OH}\cdot\text{HCl}$ ) solution 50% w/v in water was purchased from Alfa Aesar Tianjing Chemical Reagent Company (Tianjing, China). All of the proteins were purchased from Beijing Biodee Biotechnology Co., Ltd. (Beijing, China). All the other reagents were purchased from Shanghai Chemical Reagent Company (Shanghai, China). All the reagents were of at least analytical grade and were used without any other further purification. The oligonucleotide solution in this work was obtained by diluting the stock solution with a 20 mM Tris-HCl buffer (pH 7.4) which contained 140 mM NaCl and 5mM KCl. The protein solutions were prepared with deionized water.

UV-visible absorption spectra were recorded on a Scinco S3100 UV-Vis Spectrophotometer (Scientific Instrument Company, Daejeon City, Korea). The resonance light scattering (RLS) signal was conducted on an Edinburgh FLS-920 spectrophotometer. Water used throughout the experiments was purified by a Milli-Q system (Millipore, Bedford, MA, USA).

**Synthesis of AuNPs** Water-soluble AuNPs with the diameter of 13 nm were synthesized according to a literature method.<sup>[1]</sup> The 200mL of 1 mM  $\text{HAuCl}_4$  solution was put in a three-necked flask and was heated to reflux for 5 minutes under vigorous stirring, 20 mL of 38.8 mM sodium citrate solution was then immediately added into the boiling solution. With a color change from light yellow to wine red. After the mixture was allowed to reflux for 15 minutes, the heating was stopped, but stirring was continued for an additional 15 minutes, then the solution was cooled to the room temperature. After that, the solution was filtered through a 0.22  $\mu\text{m}$  membrane filter and stored in a fridge of 4°C before being used. The concentration of AuNPs (13 nm

in diameter) was measured by UV-Vis spectroscopy based on an extinction coefficient of  $2.7 \times 10^8 \text{ M}^{-1} \cdot \text{cm}^{-1}$  at 520 nm.

**The fabrication of the multidimensional sensing system** A single-strand oligonucleotide (A21) was designed to construct the sensing system. The oligonucleotide (11  $\mu\text{L}$  of 1.0  $\mu\text{M}$ ) was added into the as-prepared AuNPs solution (137  $\mu\text{L}$  of 10.0 nM). The mixture was incubated for 0.5 hour to form **A21-AuNPs** conjugates as sensing element solution on a shaker at room temperature, which was equally divided into three fractions for the multidimensional sensing proteins.

**Discrimination of proteins** The as-prepared conjugates of **A21-AuNPs** were employed to this multidimensional **sensor array** for the detection of proteins. The protein solution (11  $\mu\text{L}$  of 1.0  $\mu\text{M}$ ) (or blank solution) was mixed with as-prepared **A21-AuNPs** conjugates solution and incubated for about 30 minutes at room temperature. Then, this sensing platform is involved three processes. In the first process, the mixture was diluted to a total of 220  $\mu\text{L}$ . The resonance light scattering (RLS) signal at 650 nm was recorded. The final concentrations of AuNPs, DNA and protein, were 6.25 nM, 50 nM and 50 nM, respectively. In the later process, the reductant  $\text{NH}_2\text{OH}$  (1.0 M, 11  $\mu\text{L}$ ) and oxidant  $\text{HAuCl}_4$  (1.0 mM, 11  $\mu\text{L}$ ) was added into the same mixture to induce the growth of AuNPs, continuing to incubate for half an hour. Subsequently, the mixture solution was also diluted with deionized water to 220  $\mu\text{L}$ . Then the absorbance of the mixture at 520 nm and 620 nm were recorded. The final concentrations of  $\text{NH}_2\text{OH}$  and  $\text{HAuCl}_4$ , were 50 mM, and 50  $\mu\text{M}$ , respectively. The last sensing process was the same as the second detection except that the  $\text{NH}_2\text{OH}$  and  $\text{HAuCl}_4$  were replaced with NaCl at the final concentration of 25 mM. In the multidimensional **sensing system**, the changes in the three optical signals of AuNPs lead to the discrimination of proteins.

**Real sample detection** In tests with human urine samples, morning urine from a health volunteer was collected and centrifuged for 10 minutes (14000 rpm) to remove the insoluble matrix. Urine was diluted with deionized water to 50% (v/v). All other conditions were equivalent to the above tests except there is no additional salt added into the urine samples.

**Data analysis** All measurements were repeated to generate six replicates for each protein. To eliminate the potential bias caused by the difference in the original signal intensity of sensing system, the raw data were first normalized ( $k/k_0$ ). The data was analyzed by linear discriminant analysis (LDA) applying Mahalanobis clustering analysis and hierarchical cluster analysis (HCA), using the software SYSTAT V13.0 and SPSS V16.0, respectively. LDA is a type of statistic software to recognize the linear combination of features that differentiate two or more classes of object or event, which can transform the raw response patterns to canonical patterns, and maximizes the ratio of between-class variance to within-class variance, thereby it can enable maximal separability according to the preassigned grouping.<sup>[2]</sup> HCA is a model-free method based on the grouping of the analyte vectors according to their spatial distances in their full vector space.<sup>[3]</sup> After the analysis, three canonical factors were generated that represented linear combinations of the response matrices, obtained from the absorbance response patterns (three channels  $\times$  thirteen proteins  $\times$  six replicates). The first two or three most significant discrimination factors were used to generate a two or three-dimensional plot.

**Table S1.** Basic properties and manufacturers of proteins

| Protein                               | MW/kDa | pI    | Metal | Company | Purity |
|---------------------------------------|--------|-------|-------|---------|--------|
| Bovine serum albumin (BSA)            | 66.3   | 4.8   | No    | Amresco | >98%   |
| Concanavalin A (Con-A)                | 102    | ~7.1  | NO    | BioDee  | >90%   |
| Cytochrome C (Cyt-C)                  | 12     | 10.8  | Yes   | Amresco | >98%   |
| Egg white albumin (EA)                | 44.3   | 4.6   | No    | Sigma   | >95%   |
| Hemoglobin (Hem) from bovine blood    | 64.5   | 6.8   | Yes   | Sigma   | >95%   |
| Horseradish Peroxidase (HRP)          | ~40    | ~5    | Yes   | BioDee  | >95%   |
| Human serum albumin (HSA)             | 69.4   | 5.2   | No    | Sigma   | >95%   |
| Immunoglobulin G (IgG) from pig blood | 150    | 7.5   | No    | Sigma   | >90%   |
| Lysozyme (Lys)                        | 14.4   | 11.0  | No    | Amresco | >95%   |
| myoglobin (Myo)                       | 17     | 7.2   | Yes   | Sigma   | >95%   |
| Pepsin (Pep) 1:3000                   | 35     | 1~2.5 | No    | Sigma   | >85%   |
| Transferrin (TRF) from human blood    | ~75    | 5.6   | Yes   | Sigma   | >98%   |
| Trypsin (Try) 1:250                   | 24     | 10.5  | No    | Amresco | >95%   |

**Table S2.** Training matrix of the response patterns against various proteins at 50 nM

| Proteins | Color 1 | Color 2 | Color 3 |
|----------|---------|---------|---------|
| BSA      | 0.619   | 0.523   | 0.266   |
| BSA      | 0.618   | 0.522   | 0.264   |
| BSA      | 0.618   | 0.520   | 0.247   |
| BSA      | 0.610   | 0.503   | 0.247   |
| BSA      | 0.604   | 0.501   | 0.246   |
| BSA      | 0.593   | 0.499   | 0.238   |
| Con-A    | 1.088   | 0.698   | 2.145   |
| Con-A    | 1.084   | 0.692   | 2.141   |
| Con-A    | 1.082   | 0.691   | 2.141   |
| Con-A    | 1.080   | 0.690   | 2.141   |
| Con-A    | 1.075   | 0.687   | 2.138   |
| Con-A    | 1.060   | 0.686   | 2.137   |
| Cyt-C    | 1.110   | 0.998   | 2.143   |
| Cyt-C    | 1.101   | 0.996   | 2.142   |
| Cyt-C    | 1.088   | 0.991   | 2.142   |
| Cyt-C    | 1.079   | 0.991   | 2.141   |
| Cyt-C    | 1.076   | 0.990   | 2.133   |
| Cyt-C    | 1.071   | 0.988   | 2.132   |
| EA       | 1.046   | 0.898   | 0.228   |
| EA       | 1.044   | 0.884   | 0.227   |
| EA       | 1.031   | 0.879   | 0.226   |
| EA       | 1.027   | 0.872   | 0.225   |
| EA       | 1.021   | 0.856   | 0.224   |
| EA       | 1.014   | 0.838   | 0.223   |
| Hem      | 1.291   | 1.076   | 1.995   |
| Hem      | 1.290   | 1.075   | 1.991   |
| Hem      | 1.286   | 1.051   | 1.990   |
| Hem      | 1.278   | 1.046   | 1.913   |
| Hem      | 1.269   | 1.013   | 1.911   |
| Hem      | 1.235   | 1.005   | 1.895   |
| HRP      | 1.242   | 1.136   | 0.435   |
| HRP      | 1.236   | 1.128   | 0.432   |

|     |       |       |       |
|-----|-------|-------|-------|
| HRP | 1.233 | 1.113 | 0.429 |
| HRP | 1.222 | 1.109 | 0.426 |
| HRP | 1.221 | 1.109 | 0.420 |
| HRP | 1.197 | 1.098 | 0.414 |
| HSA | 0.668 | 0.566 | 0.248 |
| HSA | 0.662 | 0.553 | 0.248 |
| HSA | 0.662 | 0.545 | 0.246 |
| HSA | 0.660 | 0.545 | 0.245 |
| HSA | 0.660 | 0.541 | 0.243 |
| HSA | 0.655 | 0.537 | 0.242 |
| IgG | 1.217 | 0.902 | 1.983 |
| IgG | 1.213 | 0.882 | 1.964 |
| IgG | 1.206 | 0.870 | 1.947 |
| IgG | 1.205 | 0.863 | 1.945 |
| IgG | 1.201 | 0.862 | 1.917 |
| IgG | 1.192 | 0.849 | 1.911 |
| Lys | 0.923 | 1.011 | 1.899 |
| Lys | 0.906 | 1.000 | 1.898 |
| Lys | 0.892 | 0.991 | 1.875 |
| Lys | 0.889 | 0.974 | 1.873 |
| Lys | 0.878 | 0.970 | 1.866 |
| Lys | 0.872 | 0.965 | 1.864 |
| Myo | 1.061 | 0.974 | 1.591 |
| Myo | 1.047 | 0.973 | 1.587 |
| Myo | 1.045 | 0.968 | 1.571 |
| Myo | 1.045 | 0.967 | 1.548 |
| Myo | 1.031 | 0.960 | 1.546 |
| Myo | 1.028 | 0.951 | 1.542 |
| Pep | 0.729 | 0.817 | 0.262 |
| Pep | 0.705 | 0.816 | 0.246 |
| Pep | 0.704 | 0.796 | 0.243 |
| Pep | 0.693 | 0.792 | 0.242 |
| Pep | 0.659 | 0.790 | 0.242 |
| Pep | 0.658 | 0.787 | 0.241 |
| TRF | 0.902 | 0.976 | 0.197 |

|     |       |       |       |
|-----|-------|-------|-------|
| TRF | 0.884 | 0.970 | 0.197 |
| TRF | 0.861 | 0.960 | 0.196 |
| TRF | 0.856 | 0.958 | 0.196 |
| TRF | 0.848 | 0.956 | 0.194 |
| TRF | 0.834 | 0.942 | 0.193 |
| Try | 0.983 | 1.011 | 0.191 |
| Try | 0.976 | 0.998 | 0.190 |
| Try | 0.975 | 0.997 | 0.190 |
| Try | 0.973 | 0.997 | 0.189 |
| Try | 0.957 | 0.995 | 0.187 |
| Try | 0.951 | 0.992 | 0.186 |

---



| Color 1 | Color 2 | Color 3 | Correct / % |
|---------|---------|---------|-------------|
|         |         |         | 74%         |
|         |         |         | 68%         |
|         |         |         | 63%         |
|         |         |         | 95%         |
|         |         |         | 91%         |
|         |         |         | 97%         |
|         |         |         | 100%        |

**Figure S1.** Jackknifed classification matrix obtained using LDA for sensing channels for the 13 proteins.

**Table S3.** LDA classification accuracy of proteins (50 nM) using the triple channel colorimetric sensor array. The values are taken from the Jackknifed classification matrix based on raw data listed in **Table S2**

| Proteins | Color 1 | Color 2 | Color 3 | Color 1 and 2 | Color 1 and 3 | Color 2 and 3 | Triple Channels |
|----------|---------|---------|---------|---------------|---------------|---------------|-----------------|
| BSA      | 100     | 100     | 33      | 100           | 100           | 100           | 100             |
| Con-A    | 50      | 100     | 67      | 100           | 67            | 100           | 100             |
| Cyt-C    | 50      | 50      | 33      | 100           | 50            | 100           | 100             |
| EA       | 67      | 0       | 100     | 100           | 100           | 100           | 100             |
| HRP      | 83      | 100     | 100     | 100           | 100           | 100           | 100             |
| HSA      | 100     | 100     | 33      | 100           | 100           | 100           | 100             |
| Hem      | 83      | 67      | 0       | 100           | 100           | 67            | 100             |
| IgG      | 83      | 0       | 17      | 100           | 100           | 100           | 100             |
| Lys      | 67      | 0       | 100     | 67            | 100           | 100           | 100             |
| Myo      | 50      | 67      | 100     | 100           | 100           | 100           | 100             |
| Pep      | 67      | 100     | 17      | 100           | 67            | 100           | 100             |
| TRF      | 67      | 67      | 100     | 67            | 100           | 100           | 100             |
| Try      | 100     | 67      | 100     | 100           | 100           | 100           | 100             |
| Total    | 74      | 63      | 62      | 95            | 91            | 97            | 100             |

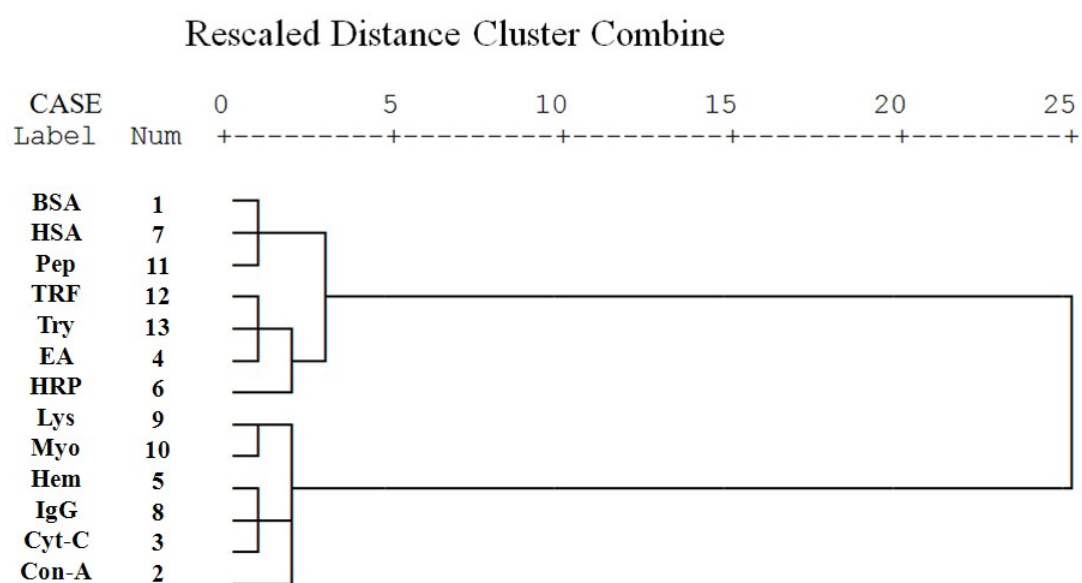

**Figure S2.** Hierarchical cluster analysis dendrogram for 13 protein analytes at 50 nM, all experiments were run in six replicates.

**Table S4.** Identification of unknown protein samples at 50 nM using the **triple channel colorimetric sensor array**

|    | Color 1 | Color 2 | Color 3 | Identification | Verification |
|----|---------|---------|---------|----------------|--------------|
| 1  | 0.660   | 0.527   | 0.288   | BSA            | BSA          |
| 2  | 0.642   | 0.549   | 0.250   | HSA            | HSA          |
| 3  | 0.983   | 1.027   | 1.904   | Lys            | Lys          |
| 4  | 1.012   | 0.949   | 1.529   | Myo            | Myo          |
| 5  | 0.813   | 0.985   | 0.205   | TRF            | TRF          |
| 6  | 1.066   | 1.013   | 2.125   | Cyt-C          | Cyt-C        |
| 7  | 1.060   | 0.723   | 2.127   | Con-A          | Con-A        |
| 8  | 1.225   | 0.934   | 1.941   | IgG            | IgG          |
| 9  | 1.276   | 1.158   | 0.414   | HRP            | HRP          |
| 10 | 0.931   | 0.852   | 0.222   | EA             | EA           |
| 11 | 0.757   | 0.844   | 0.234   | Pep            | Pep          |
| 12 | 0.628   | 0.559   | 0.242   | HSA            | HSA          |
| 13 | 1.176   | 0.945   | 1.769   | Hem            | Hem          |
| 14 | 0.967   | 1.017   | 0.197   | Try            | Try          |
| 15 | 1.054   | 0.653   | 2.102   | Con-A          | Con-A        |
| 16 | 1.182   | 0.919   | 1.881   | IgG            | IgG          |
| 17 | 0.794   | 0.886   | 0.192   | TRF            | TRF          |
| 18 | 1.097   | 0.985   | 1.671   | Myo            | Myo          |
| 19 | 0.832   | 0.927   | 1.849   | Lys            | Lys          |
| 20 | 0.798   | 0.857   | 0.263   | Pep            | Pep          |
| 21 | 0.589   | 0.478   | 0.235   | BSA            | BSA          |
| 22 | 0.952   | 1.013   | 0.193   | Try            | Try          |
| 23 | 1.191   | 0.945   | 1.812   | Hem            | Hem          |
| 24 | 1.111   | 1.022   | 2.127   | Cyt-C          | Cyt-C        |
| 25 | 1.115   | 0.756   | 2.148   | Con-A          | Con-A        |
| 26 | 1.062   | 1.003   | 2.124   | Cyt-C          | Cyt-C        |
| 27 | 1.062   | 0.928   | 0.236   | EA             | EA           |
| 28 | 0.671   | 0.543   | 0.254   | HSA            | HSA          |
| 29 | 0.980   | 0.950   | 0.185   | Try            | Try          |
| 30 | 0.701   | 0.771   | 0.234   | Pep            | Pep          |
| 31 | 1.080   | 0.745   | 2.131   | Con-A          | Con-A        |

|    |       |       |       |       |       |
|----|-------|-------|-------|-------|-------|
| 32 | 1.133 | 0.905 | 1.859 | IgG   | IgG   |
| 33 | 0.812 | 0.927 | 0.200 | TRF   | TRF   |
| 34 | 1.188 | 1.070 | 0.398 | HRP   | HRP   |
| 35 | 0.974 | 0.922 | 0.235 | EA    | EA    |
| 36 | 0.650 | 0.525 | 0.236 | HSA   | HSA   |
| 37 | 0.969 | 0.962 | 0.186 | Try   | Try   |
| 38 | 1.171 | 0.930 | 1.768 | Hem   | Hem   |
| 39 | 1.125 | 0.987 | 1.673 | Myo   | Myo   |
| 40 | 1.181 | 0.915 | 1.876 | IgG   | IgG   |
| 41 | 1.112 | 1.023 | 2.144 | Cyt-C | Cyt-C |
| 42 | 0.802 | 0.926 | 0.193 | TRF   | TRF   |
| 43 | 1.004 | 1.033 | 1.924 | Lys   | Lys   |
| 44 | 1.192 | 1.151 | 0.402 | HRP   | HRP   |
| 45 | 0.568 | 0.471 | 0.231 | BSA   | BSA   |
| 46 | 0.641 | 0.711 | 0.232 | Pep   | Pep   |
| 47 | 0.961 | 0.961 | 1.854 | Lys   | Lys   |
| 48 | 0.906 | 0.815 | 0.219 | EA    | EA    |
| 49 | 0.923 | 0.943 | 1.508 | Myo   | Myo   |
| 50 | 1.182 | 1.062 | 0.397 | HRP   | HRP   |
| 51 | 1.301 | 0.987 | 1.855 | Hem   | Hem   |
| 52 | 0.631 | 0.548 | 0.249 | BSA   | BSA   |

---

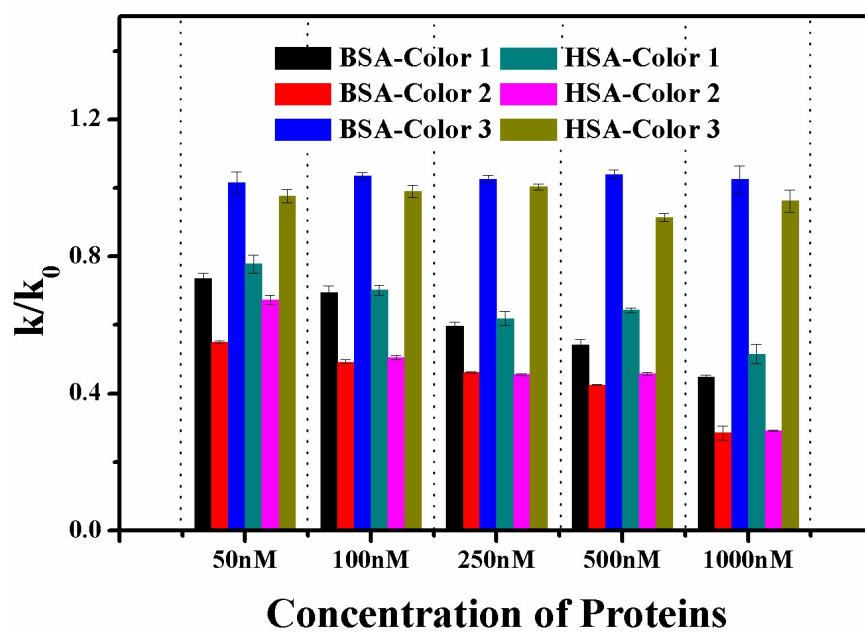

**Figure S3.** Fingerprints of HSA and BSA at various concentrations based on the patterns of the corresponding values of  $k/k_0$  obtained from the triple channel colorimetric sensor array.

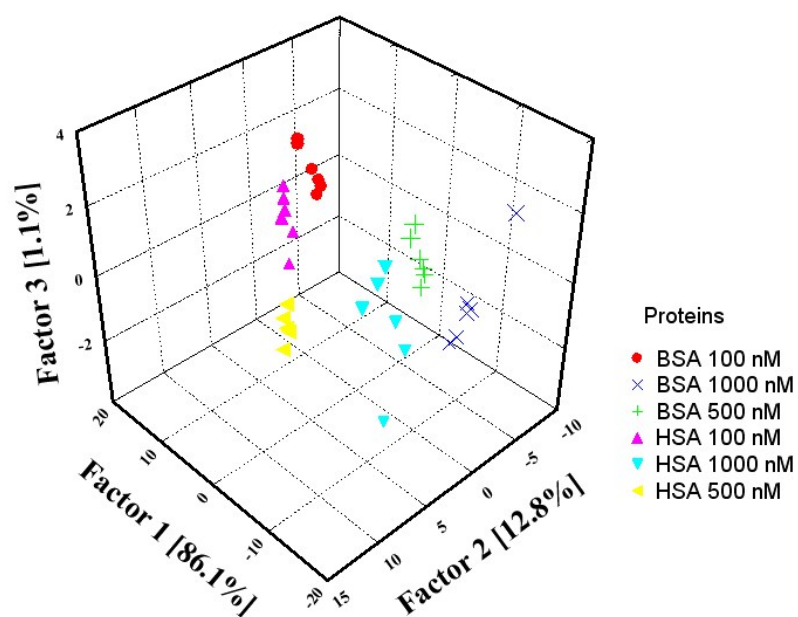

**Figure S4.** Canonical score plot for the three-channel patterns as obtained from LDA for BSA and HSA at different concentrations (100, 500 and 1000nM).

**Table S5.** Training matrix of the response patterns against BSA and HSA at various concentrations

| <b>Proteins</b> | <b>Color 1</b> | <b>Color 2</b> | <b>Color 3</b> |
|-----------------|----------------|----------------|----------------|
| BSA 100 nM      | 0.677          | 0.485          | 1.022          |
| BSA 100 nM      | 0.677          | 0.486          | 1.030          |
| BSA 100 nM      | 0.683          | 0.490          | 1.033          |
| BSA 100 nM      | 0.694          | 0.495          | 1.036          |
| BSA 100 nM      | 0.716          | 0.498          | 1.043          |
| BSA 100 nM      | 0.718          | 0.499          | 1.046          |
| HSA 100 nM      | 0.680          | 0.501          | 0.961          |
| HSA 100 nM      | 0.689          | 0.501          | 0.985          |
| HSA 100 nM      | 0.704          | 0.501          | 0.987          |
| HSA 100 nM      | 0.705          | 0.503          | 0.994          |
| HSA 100 nM      | 0.714          | 0.513          | 1.002          |
| HSA 100 nM      | 0.719          | 0.514          | 1.010          |
| BSA 500 nM      | 0.525          | 0.423          | 1.022          |
| BSA 500 nM      | 0.528          | 0.425          | 1.033          |
| BSA 500 nM      | 0.532          | 0.425          | 1.036          |
| BSA 500 nM      | 0.541          | 0.426          | 1.040          |
| BSA 500 nM      | 0.559          | 0.426          | 1.047          |
| BSA 500 nM      | 0.562          | 0.429          | 1.059          |
| HSA 500 nM      | 0.636          | 0.453          | 0.896          |
| HSA 500 nM      | 0.638          | 0.453          | 0.912          |
| HSA 500 nM      | 0.640          | 0.459          | 0.912          |
| HSA 500 nM      | 0.644          | 0.460          | 0.913          |
| HSA 500 nM      | 0.651          | 0.460          | 0.918          |
| HSA 500 nM      | 0.654          | 0.462          | 0.930          |
| BSA 1000 nM     | 0.444          | 0.269          | 1.019          |
| BSA 1000 nM     | 0.447          | 0.274          | 1.100          |
| BSA 1000 nM     | 0.453          | 0.305          | 0.991          |
| BSA 1000 nM     | 0.456          | 0.313          | 1.027          |
| BSA 1000 nM     | 0.448          | 0.282          | 1.016          |
| BSA 1000 nM     | 0.444          | 0.266          | 0.994          |
| HSA 1000 nM     | 0.476          | 0.290          | 0.902          |
| HSA 1000 nM     | 0.538          | 0.292          | 0.983          |
| HSA 1000 nM     | 0.542          | 0.295          | 0.961          |
| HSA 1000 nM     | 0.539          | 0.294          | 0.997          |
| HSA 1000 nM     | 0.508          | 0.291          | 0.971          |
| HSA 1000 nM     | 0.488          | 0.290          | 0.959          |

**Table S6.** Identification of unknown protein samples at various concentrations using the **triple channel colorimetric sensor array**

|    | Color 1 | Color 2 | Color 3 | Identification | Verification |
|----|---------|---------|---------|----------------|--------------|
| 1  | 0.709   | 0.501   | 1.004   | HAS 100 nM     | HAS 100 nM   |
| 2  | 0.497   | 0.274   | 1.220   | BSA 1000 nM    | BSA 1000 nM  |
| 3  | 0.608   | 0.480   | 0.907   | HSA 500 nM     | HSA 500 nM   |
| 4  | 0.508   | 0.291   | 0.942   | HSA 1000 nM    | HSA 1000 nM  |
| 5  | 0.669   | 0.490   | 1.051   | BSA 100 nM     | BSA 100 nM   |
| 6  | 0.621   | 0.448   | 0.995   | HSA 500 nM     | HSA 500 nM   |
| 7  | 0.542   | 0.295   | 0.923   | HSA 1000 nM    | HSA 1000 nM  |
| 8  | 0.560   | 0.428   | 1.082   | BSA 500 nM     | BSA 500 nM   |
| 9  | 0.636   | 0.483   | 1.061   | BSA 100 nM     | BSA 100 nM   |
| 10 | 0.577   | 0.428   | 1.066   | BSA 500 nM     | BSA 500 nM   |
| 11 | 0.506   | 0.313   | 1.074   | BSA 1000 nM    | BSA 1000 nM  |
| 12 | 0.494   | 0.269   | 1.058   | BSA 1000 nM    | BSA 1000 nM  |
| 13 | 0.538   | 0.292   | 0.966   | HSA 1000 nM    | HSA 1000 nM  |
| 14 | 0.760   | 0.506   | 0.988   | HAS 100 nM     | HAS 100 nM   |
| 15 | 0.728   | 0.502   | 1.021   | HSA 100 nM     | HSA 100 nM   |
| 16 | 0.682   | 0.494   | 1.034   | BSA 100 nM     | BSA 100 nM   |
| 17 | 0.571   | 0.447   | 0.912   | HSA 500 nM     | HSA 500 nM   |
| 18 | 0.558   | 0.427   | 1.090   | BSA 500 nM     | BSA 500 nM   |



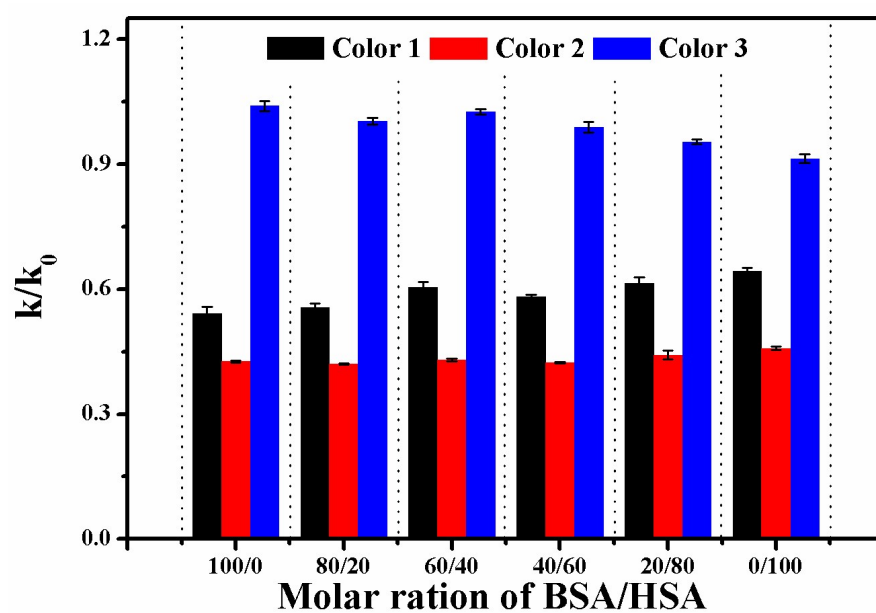

**Figure S5.** Fingerprints of BSA and HSA at different molar ratios (total protein concentration: 500 nM) based on the patterns of the corresponding values of  $k/k_0$  obtained from the **triple channel colorimetric sensor array**.

**Table S7.** Training matrix of the response patterns against BSA and HSA at different molar ratios (total protein concentration: 500 nM)

| Samples           | Color 1 | Color 2 | Color 3 |
|-------------------|---------|---------|---------|
| 100% BSA          | 0.525   | 0.423   | 1.022   |
| 100% BSA          | 0.528   | 0.425   | 1.033   |
| 100% BSA          | 0.532   | 0.425   | 1.036   |
| 100% BSA          | 0.541   | 0.426   | 1.040   |
| 100% BSA          | 0.559   | 0.426   | 1.047   |
| 100% BSA          | 0.562   | 0.429   | 1.059   |
| 80% BSA + 20% HSA | 0.543   | 0.418   | 0.993   |
| 80% BSA + 20% HSA | 0.549   | 0.419   | 0.995   |
| 80% BSA + 20% HSA | 0.558   | 0.420   | 0.999   |
| 80% BSA + 20% HSA | 0.563   | 0.420   | 1.010   |
| 80% BSA + 20% HSA | 0.563   | 0.421   | 1.011   |
| 80% BSA + 20% HSA | 0.564   | 0.421   | 1.013   |
| 60% BSA + 40% HSA | 0.588   | 0.426   | 1.019   |
| 60% BSA + 40% HSA | 0.598   | 0.428   | 1.020   |
| 60% BSA + 40% HSA | 0.606   | 0.429   | 1.022   |
| 60% BSA + 40% HSA | 0.607   | 0.430   | 1.028   |
| 60% BSA + 40% HSA | 0.609   | 0.430   | 1.032   |
| 60% BSA + 40% HSA | 0.622   | 0.435   | 1.033   |
| 40% BSA + 60% HSA | 0.576   | 0.422   | 0.964   |
| 40% BSA + 60% HSA | 0.578   | 0.422   | 0.987   |
| 40% BSA + 60% HSA | 0.583   | 0.422   | 0.989   |
| 40% BSA + 60% HSA | 0.586   | 0.423   | 0.995   |
| 40% BSA + 60% HSA | 0.586   | 0.425   | 0.998   |
| 40% BSA + 60% HSA | 0.587   | 0.427   | 1.001   |
| 20% BSA + 80% HSA | 0.594   | 0.430   | 0.946   |
| 20% BSA + 80% HSA | 0.600   | 0.435   | 0.947   |
| 20% BSA + 80% HSA | 0.609   | 0.435   | 0.955   |
| 20% BSA + 80% HSA | 0.621   | 0.448   | 0.955   |
| 20% BSA + 80% HSA | 0.624   | 0.452   | 0.959   |
| 20% BSA + 80% HSA | 0.634   | 0.452   | 0.960   |
| 100% HSA          | 0.636   | 0.453   | 0.896   |

|          |       |       |       |
|----------|-------|-------|-------|
| 100% HSA | 0.638 | 0.453 | 0.912 |
| 100% HSA | 0.640 | 0.459 | 0.912 |
| 100% HSA | 0.644 | 0.460 | 0.913 |
| 100% HSA | 0.651 | 0.460 | 0.918 |
| 100% HSA | 0.654 | 0.462 | 0.930 |

---

**Table S8.** Identification of unknown protein samples at different molar ratios using the triple channel colorimetric sensor array

| Samples | Color 1 | Color 2 | Color 3 | Identification    | Verification      |
|---------|---------|---------|---------|-------------------|-------------------|
| 1       | 0.558   | 0.466   | 1.045   | 100% BSA          | 100% BSA          |
| 2       | 0.615   | 0.483   | 0.918   | 100% HSA          | 100% HSA          |
| 3       | 0.598   | 0.434   | 0.998   | 40% BSA + 60% HSA | 40% BSA + 60% HSA |
| 4       | 0.583   | 0.433   | 1.020   | 80% BSA + 20% HSA | 80% BSA + 20% HSA |
| 5       | 0.597   | 0.415   | 1.014   | 60% BSA + 40% HSA | 60% BSA + 40% HSA |
| 6       | 0.621   | 0.485   | 0.913   | 100% HSA          | 100% HSA          |
| 7       | 0.571   | 0.429   | 0.995   | 80% BSA + 20% HSA | 80% BSA + 20% HSA |
| 8       | 0.570   | 0.482   | 1.052   | 100% BSA          | 100% BSA          |
| 9       | 0.618   | 0.468   | 0.955   | 20% BSA + 80% HSA | 20% BSA + 80% HSA |
| 10      | 0.587   | 0.423   | 0.987   | 40% BSA + 60% HSA | 40% BSA + 60% HSA |
| 11      | 0.594   | 0.434   | 1.022   | 60% BSA + 40% HSA | 60% BSA + 40% HSA |
| 12      | 0.577   | 0.484   | 1.064   | 100% BSA          | 100% BSA          |
| 13      | 0.671   | 0.471   | 0.930   | 100% HSA          | 100% HSA          |
| 14      | 0.609   | 0.424   | 1.001   | 40% BSA + 60% HSA | 40% BSA + 60% HSA |
| 15      | 0.582   | 0.412   | 1.005   | 60% BSA + 40% HSA | 60% BSA + 40% HSA |
| 16      | 0.577   | 0.449   | 0.989   | 80% BSA + 20% HSA | 80% BSA + 20% HSA |
| 17      | 0.591   | 0.503   | 0.959   | 20% BSA + 80% HSA | 20% BSA + 80% HSA |
| 18      | 0.608   | 0.480   | 0.912   | 100% HSA          | 100% HSA          |
| 19      | 0.568   | 0.427   | 0.989   | 40% BSA + 60% HSA | 40% BSA + 60% HSA |
| 20      | 0.579   | 0.504   | 0.960   | 20% BSA + 80% HSA | 20% BSA + 80% HSA |
| 21      | 0.604   | 0.469   | 0.955   | 20% BSA + 80% HSA | 20% BSA + 80% HSA |
| 22      | 0.560   | 0.480   | 1.041   | 100% BSA          | 100% BSA          |
| 23      | 0.609   | 0.487   | 1.001   | 80% BSA + 20% HSA | 80% BSA + 20% HSA |
| 24      | 0.590   | 0.412   | 1.010   | 60% BSA + 40% HSA | 60% BSA + 40% HSA |

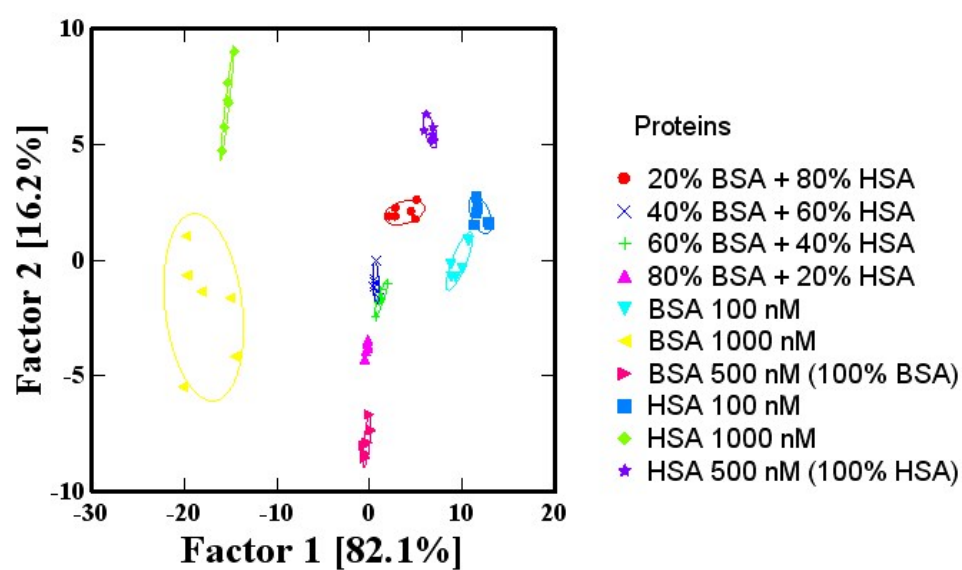

**Figure S6.** Canonical score plot for the three-channel patterns as obtained from LDA for BSA and HSA at different concentrations (100, 500 and 1000nM) and mixtures of BSA and HSA at different molar ratios (total protein concentration: 500 nM).

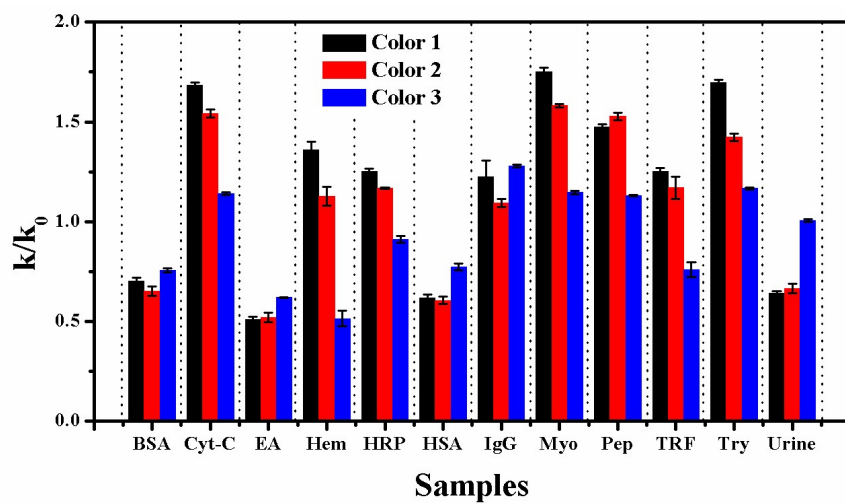

**Figure S7.** Fingerprints of proteins at the 500 nM level in the presence of human urine based on the patterns of the corresponding values of  $k/k_0$  obtained from the **triple channel colorimetric sensor array**.

**Table S9.** Training matrix of the response patterns against proteins at the 500 nM level in the presence of human urine

| Proteins | Color 1 | Color 2 | Color 3 |
|----------|---------|---------|---------|
| BSA      | 0.669   | 0.627   | 0.736   |
| BSA      | 0.702   | 0.635   | 0.753   |
| BSA      | 0.706   | 0.638   | 0.758   |
| BSA      | 0.706   | 0.658   | 0.760   |
| BSA      | 0.707   | 0.658   | 0.760   |
| BSA      | 0.718   | 0.689   | 0.763   |
| Cyt-C    | 1.670   | 1.518   | 1.131   |
| Cyt-C    | 1.675   | 1.526   | 1.133   |
| Cyt-C    | 1.677   | 1.536   | 1.140   |
| Cyt-C    | 1.680   | 1.541   | 1.143   |
| Cyt-C    | 1.694   | 1.556   | 1.145   |
| Cyt-C    | 1.708   | 1.570   | 1.147   |
| EA       | 0.491   | 0.493   | 0.618   |
| EA       | 0.506   | 0.497   | 0.618   |
| EA       | 0.509   | 0.507   | 0.619   |
| EA       | 0.509   | 0.536   | 0.619   |
| EA       | 0.522   | 0.540   | 0.622   |
| EA       | 0.524   | 0.544   | 0.623   |
| Hem      | 1.282   | 1.054   | 0.450   |
| Hem      | 1.344   | 1.093   | 0.499   |
| Hem      | 1.356   | 1.118   | 0.507   |
| Hem      | 1.382   | 1.153   | 0.534   |
| Hem      | 1.386   | 1.164   | 0.549   |
| Hem      | 1.399   | 1.175   | 0.555   |
| HRP      | 1.228   | 1.162   | 0.887   |
| HRP      | 1.250   | 1.165   | 0.893   |
| HRP      | 1.253   | 1.166   | 0.921   |
| HRP      | 1.256   | 1.168   | 0.922   |
| HRP      | 1.259   | 1.171   | 0.925   |
| HRP      | 1.262   | 1.174   | 0.927   |
| HSA      | 0.592   | 0.577   | 0.742   |

|     |       |       |       |
|-----|-------|-------|-------|
| HSA | 0.601 | 0.588 | 0.773 |
| HSA | 0.620 | 0.612 | 0.775 |
| HSA | 0.627 | 0.619 | 0.775 |
| HSA | 0.630 | 0.619 | 0.785 |
| HSA | 0.631 | 0.623 | 0.787 |
| IgG | 1.140 | 1.069 | 1.268 |
| IgG | 1.154 | 1.082 | 1.273 |
| IgG | 1.180 | 1.087 | 1.276 |
| IgG | 1.270 | 1.094 | 1.279 |
| IgG | 1.285 | 1.108 | 1.285 |
| IgG | 1.330 | 1.125 | 1.286 |
| Myo | 1.732 | 1.569 | 1.139 |
| Myo | 1.734 | 1.573 | 1.140 |
| Myo | 1.735 | 1.582 | 1.141 |
| Myo | 1.758 | 1.586 | 1.147 |
| Myo | 1.770 | 1.587 | 1.152 |
| Myo | 1.772 | 1.588 | 1.158 |
| Pep | 1.451 | 1.501 | 1.127 |
| Pep | 1.472 | 1.509 | 1.128 |
| Pep | 1.472 | 1.532 | 1.128 |
| Pep | 1.473 | 1.535 | 1.129 |
| Pep | 1.475 | 1.537 | 1.131 |
| Pep | 1.495 | 1.550 | 1.136 |
| TRF | 1.226 | 1.118 | 0.729 |
| TRF | 1.236 | 1.126 | 0.729 |
| TRF | 1.254 | 1.147 | 0.730 |
| TRF | 1.260 | 1.148 | 0.768 |
| TRF | 1.268 | 1.239 | 0.801 |
| TRF | 1.269 | 1.242 | 0.802 |
| Try | 1.681 | 1.393 | 1.160 |
| Try | 1.685 | 1.417 | 1.164 |
| Try | 1.686 | 1.420 | 1.167 |
| Try | 1.705 | 1.432 | 1.167 |
| Try | 1.707 | 1.434 | 1.168 |
| Try | 1.714 | 1.447 | 1.174 |



|       |       |       |       |
|-------|-------|-------|-------|
| Urine | 0.633 | 0.663 | 0.995 |
| Urine | 0.634 | 0.684 | 1.002 |
| Urine | 0.651 | 0.680 | 1.002 |
| Urine | 0.646 | 0.684 | 1.006 |
| Urine | 0.647 | 0.637 | 1.008 |
| Urine | 0.641 | 0.635 | 1.019 |

---

| Color 1 | Color 2 | Color 3 | Correct / % |
|---------|---------|---------|-------------|
|         |         |         | 69%         |
|         |         |         | 64%         |
|         |         |         | 71%         |
|         |         |         | 82%         |
|         |         |         | 100%        |
|         |         |         | 93%         |
|         |         |         | 100%        |

**Figure S8.** Jackknifed classification matrix obtained using LDA for sensing channels for the 11 proteins in the presence of human urine.

**Table S10.** LDA classification accuracy of the target protein at 500 nM in the presence of human urine using the **triple channel colorimetric sensor array**. The values are taken from the Jackknifed classification matrix based on raw data listed in **Table S11**

|       | Color 1 | Color 2 | Color 3 | Color 1 and 2 | Color 1 and 3 | Color 2 and 3 | Triple Channels |
|-------|---------|---------|---------|---------------|---------------|---------------|-----------------|
| BSA   | 83      | 33      | 33      | 100           | 100           | 100           | 100             |
| Cyt-C | 67      | 50      | 17      | 100           | 100           | 50            | 100             |
| EA    | 100     | 100     | 100     | 100           | 100           | 100           | 100             |
| HRP   | 17      | 67      | 100     | 50            | 100           | 100           | 100             |
| HSA   | 67      | 100     | 83      | 100           | 100           | 100           | 100             |
| Hem   | 83      | 17      | 100     | 100           | 100           | 100           | 100             |
| IgG   | 50      | 83      | 100     | 67            | 100           | 100           | 100             |
| Myo   | 100     | 100     | 33      | 100           | 100           | 100           | 100             |
| Pep   | 100     | 50      | 83      | 100           | 100           | 67            | 100             |
| TRF   | 17      | 0       | 0       | 0             | 100           | 100           | 100             |
| Try   | 50      | 100     | 100     | 100           | 100           | 100           | 100             |
| Urine | 100     | 67      | 100     | 67            | 100           | 100           | 100             |
| Total | 69      | 64      | 71      | 82            | 100           | 93            | 100             |

**Table S11** Identification of unknown protein samples in the presence of human urine

|    | Color 1 | Color 2 | Color 3 | Identification | Verification |
|----|---------|---------|---------|----------------|--------------|
| 1  | 1.293   | 1.287   | 0.815   | TRF            | TRF          |
| 2  | 1.194   | 1.181   | 0.882   | HRP            | HRP          |
| 3  | 1.731   | 1.661   | 1.166   | Myo            | Myo          |
| 4  | 0.561   | 0.482   | 0.641   | EA             | EA           |
| 5  | 1.414   | 1.456   | 1.105   | Pep            | Pep          |
| 6  | 0.581   | 0.562   | 0.732   | HSA            | HSA          |
| 7  | 0.693   | 0.625   | 0.687   | BSA            | BSA          |
| 8  | 1.203   | 1.042   | 0.340   | Hem            | Hem          |
| 9  | 0.722   | 0.697   | 0.732   | BSA            | BSA          |
| 10 | 1.270   | 1.208   | 0.885   | HRP            | HRP          |
| 11 | 1.711   | 1.571   | 1.184   | Cyt-C          | Cyt-C        |
| 12 | 1.270   | 1.115   | 0.706   | TRF            | TRF          |
| 13 | 1.095   | 1.044   | 1.242   | IgG            | IgG          |
| 14 | 1.658   | 1.504   | 1.125   | Cyt-C          | Cyt-C        |
| 15 | 1.120   | 1.057   | 1.253   | IgG            | IgG          |
| 16 | 1.272   | 1.212   | 0.927   | HRP            | HRP          |
| 17 | 1.791   | 1.613   | 1.158   | Myo            | Myo          |
| 18 | 1.167   | 1.179   | 0.855   | HRP            | HRP          |
| 19 | 0.567   | 0.547   | 0.655   | EA             | EA           |
| 20 | 1.443   | 1.563   | 1.139   | Pep            | Pep          |
| 21 | 0.665   | 0.640   | 0.816   | HSA            | HSA          |
| 22 | 0.759   | 0.705   | 0.789   | BSA            | BSA          |
| 23 | 1.082   | 1.019   | 0.336   | Hem            | Hem          |
| 24 | 1.716   | 1.453   | 1.175   | Try            | Try          |
| 25 | 1.446   | 1.053   | 0.563   | Hem            | Hem          |
| 26 | 1.733   | 1.454   | 1.175   | Try            | Try          |
| 27 | 0.755   | 0.699   | 0.769   | BSA            | BSA          |
| 28 | 1.506   | 1.564   | 1.146   | Pep            | Pep          |
| 29 | 0.660   | 0.634   | 0.814   | HSA            | HSA          |
| 30 | 1.390   | 1.455   | 1.093   | Pep            | Pep          |
| 31 | 0.484   | 0.473   | 0.611   | EA             | EA           |
| 32 | 1.780   | 1.560   | 1.129   | Myo            | Myo          |

|    |       |       |       |       |       |
|----|-------|-------|-------|-------|-------|
| 33 | 1.301 | 1.289 | 0.824 | TRF   | TRF   |
| 34 | 1.723 | 1.595 | 1.185 | Cyt-C | Cyt-C |
| 35 | 1.368 | 1.174 | 1.291 | IgG   | IgG   |
| 36 | 1.652 | 1.369 | 1.148 | Try   | Try   |
| 37 | 1.453 | 1.198 | 0.579 | Hem   | Hem   |
| 38 | 1.666 | 1.390 | 1.152 | Try   | Try   |
| 39 | 1.124 | 1.067 | 1.289 | IgG   | IgG   |
| 40 | 1.710 | 1.517 | 1.130 | Cyt-C | Cyt-C |
| 41 | 1.215 | 1.111 | 0.698 | TRF   | TRF   |
| 42 | 1.803 | 1.634 | 1.159 | Myo   | Myo   |
| 43 | 0.480 | 0.473 | 0.600 | EA    | EA    |
| 44 | 0.588 | 0.567 | 0.737 | HSA   | HSA   |

---

## References

- [1] J. W. Liu, Y. Lu, *Nat. Protoc.* 2006, *1*, 246-252.
- [2] P. C. Jurs, G. A. Bakken, H. E. McClelland, *Chem. Rev.* 2000, *100*, 2649-2678;
- [3] A. Bajaj, O. R. Miranda, R. Phillips, I.-B. Kim, D. J. Jerry, U. H. F. Bunz, V. M. Rotello, *J. Am. Chem. Soc.* 2010, *132*, 1018-1022.
